# Supplementary material for: Bidentate-complex-derived TiO2/carbon dot photocatalysts: in situ synthesis, versatile heterostructures, and enhanced H2 evolution
Source: Royal Society of Chemistry journal article supplement (doi:10.1039/c3ta15114j), 2014-01-01
Supplement: c3ta15114j1.pdf [file c3ta15114j1.pdf]

Electronic Supplementary Information for

**Bidentate-complexes-derived TiO<sub>2</sub>/carbon dots**

**photocatalysts: *in situ* synthesis, versatile heterostructures,**

**and enhanced H<sub>2</sub> evolution**

*Jing Wang, Minmin Gao, Ghim Wei Ho\**

\*To whom correspondence should be addressed. E-mail: elehgw@nus.edu.sg

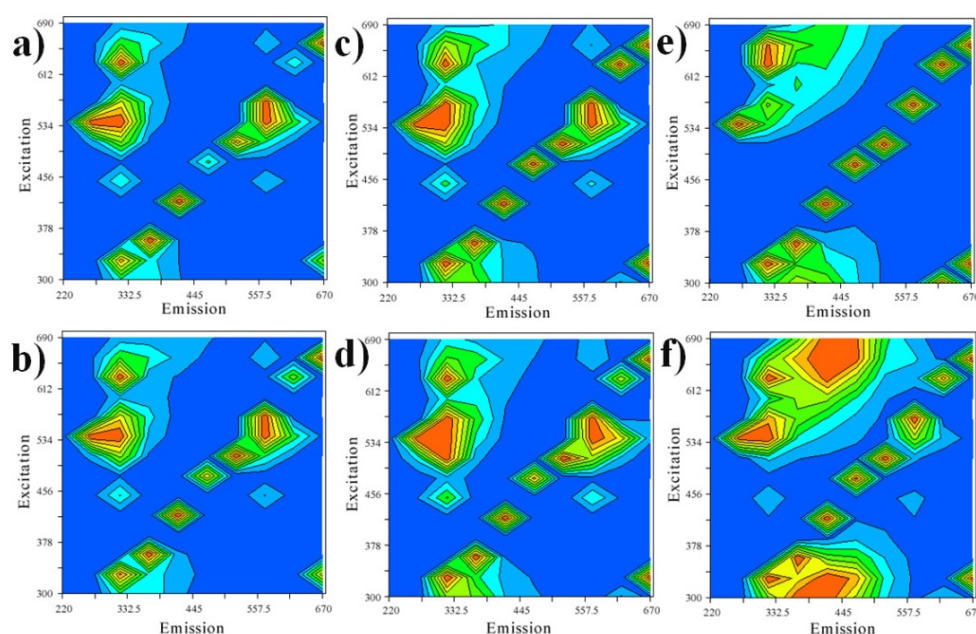

**Fig. S1** PL distribution maps of pure CDs solutions obtained at (a) 90 °C, 2 h, (b) 90 °C, 6 h, (c) 150 °C, 2 h, (d) 150 °C, 6 h, (e) 200 °C, 2 h, and (f) 200 °C, 6 h.

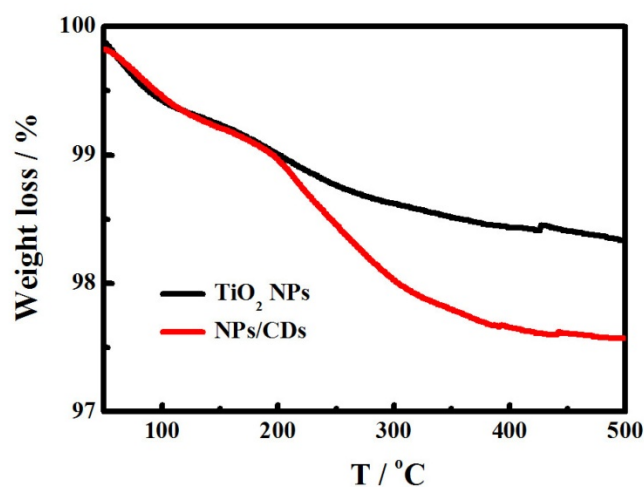

**Fig. S2** TGA curves of (black) pure TiO<sub>2</sub> NPs and (red) NPs/CDs composites.

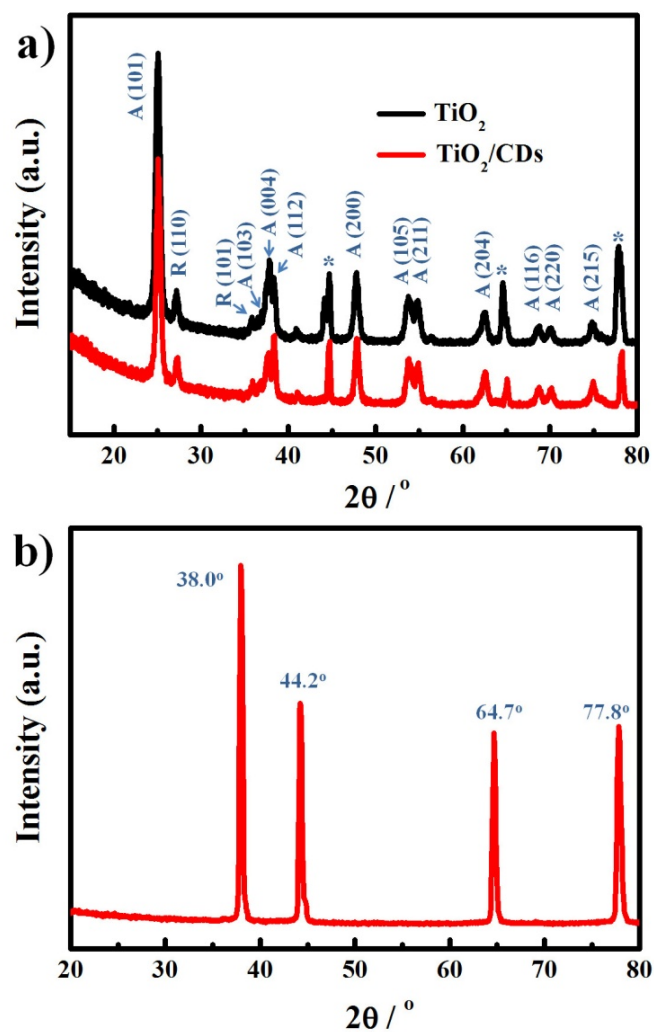

**Fig. S3** (a) XRD patterns of pure  $\text{TiO}_2$  NPs and NPs/CDs nanocomposites (A indicates anatase phase, R is the rutile phase, and the \* denotes the peaks from the sample stage), and (b) the bare sample stage.

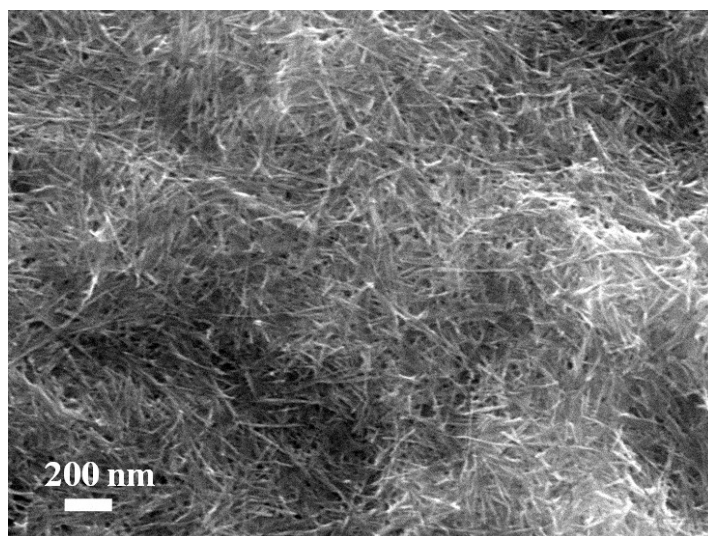

**Fig. S4** SEM image of the as-prepared  $\text{TiO}_2$  nanowires.

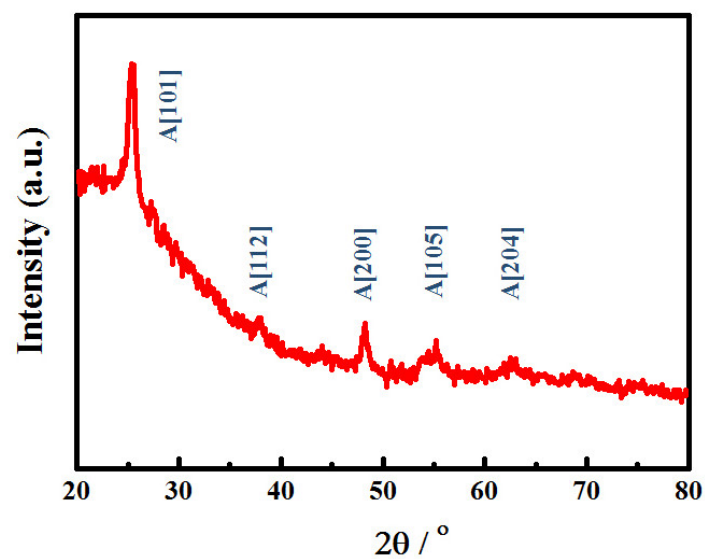

**Fig. S5** XRD patterns of the as-prepared TiO<sub>2</sub> nanowires.

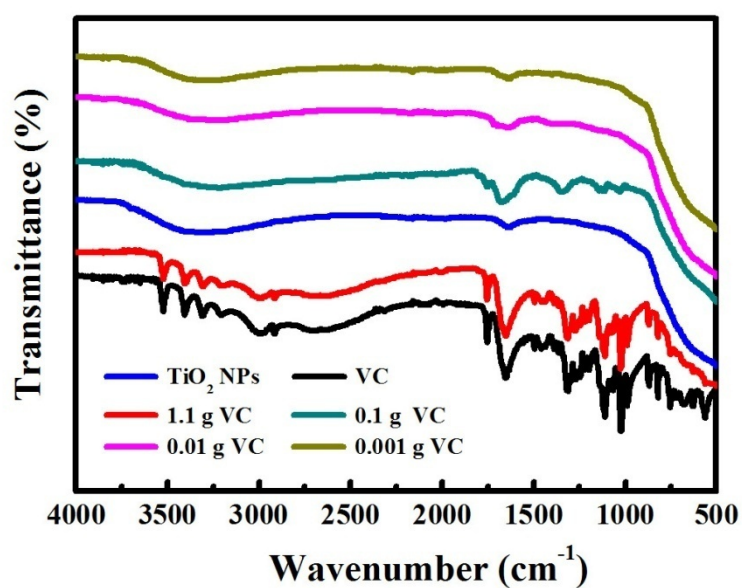

**Fig. S6** FT-IR spectra of TiO<sub>2</sub> NPs, VC and NPs/VC complexes at various VC amounts.

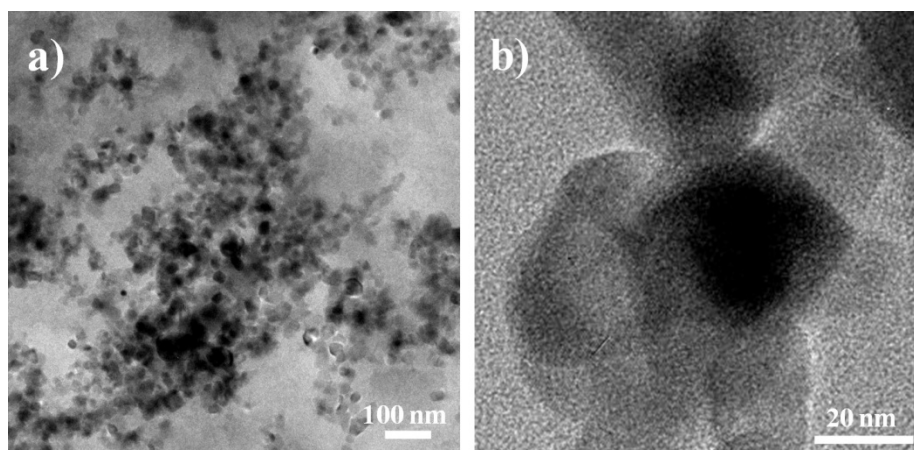

**Fig. S7** TEM images of NPs/CDs composites (obtained at VC amount of 1.1 g) at (a) low and (b) high magnification.

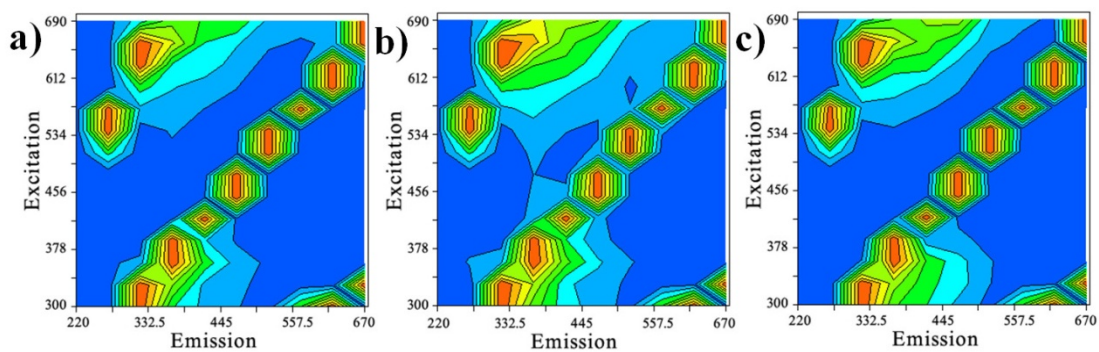

**Fig. S8** PL distribution maps of the CDs from NWs/CDs nanocomposites obtained at 90 °C for (a) 2 h, (b) 4 h and (c) 6 h.

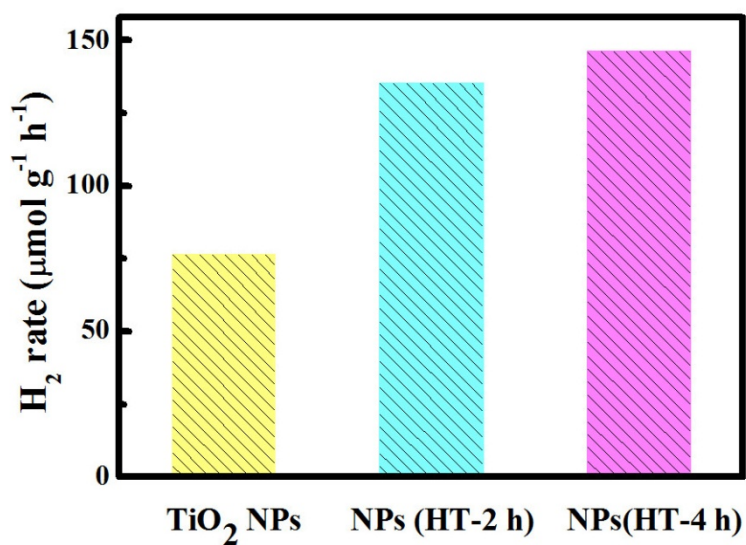

**Fig. S9** Photocatalytic H<sub>2</sub> production studies of TiO<sub>2</sub> NPs and hydrothermally treated TiO<sub>2</sub> NPs for 2 and 4 h, respectively.

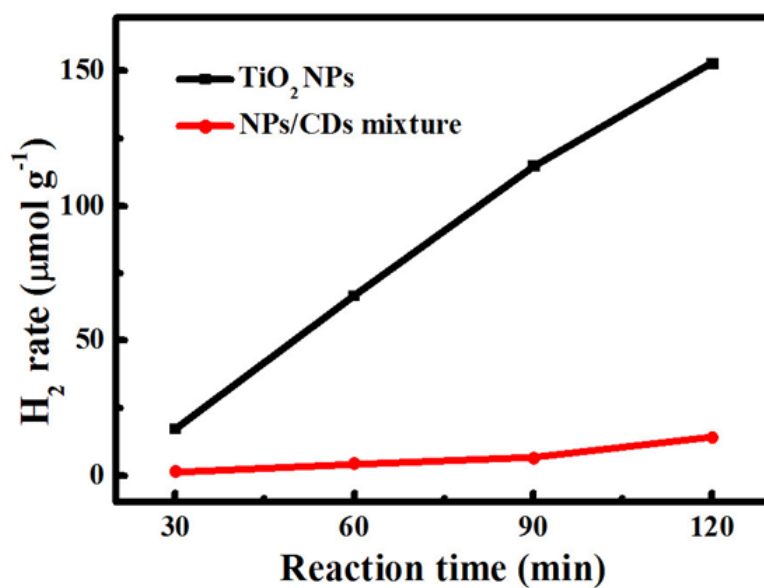

**Fig. S10** Time course of H<sub>2</sub> production from TiO<sub>2</sub> NPs and the mixture of TiO<sub>2</sub> NPs and CDs (the CDs were obtained at 90 °C for 4 h).
